# Supplementary material
Source: PubMed Central journal article supplement (PMC10569228)
Supplement: NIHMS1932696-supplement-Supplementary_Information__Incliudes_Supp_Tables_1-4.pdf [file NIHMS1932696-supplement-Supplementary_Information__Incliudes_Supp_Tables_1-4.pdf]

# **Deep neural networks predict class I major histocompatibility complex epitope presentation and transfer learn neoepitope immunogenicity**

---

In the format provided by the authors and unedited

## Supplementary Information

### IM-Positives / EL -Negatives

To estimate the ability of methods to discriminate between presented and immunogenic epitopes, we evaluated all methods using all mass-spec identified epitopes as negatives and immunogenic epitopes as positives (IM+/EL-).

To interpret the results, we considered the composition of the training sets of each method. BigMHC IM and the final version of BigMHC EL were trained using all mass-spec identified epitopes as positives, and BigMHC IM was further fine-tuned using transfer learning with the IM training set. MHCflurry-2.0, MixMHCpred-2.2, and HLATHENA were also trained using most of the EL examples as positives. TransPHLA, MHCnuggets-2.4.0, and PRIME-2.0 were not trained with these examples.

We considered that these differences in training set composition might be related to method performance, acting as confounders. To quantitatively measure the confounding effect, we used a correlation test to compare each methods performance on the IM+/EL- data with performance on EL+/rand- data (random negatives), which were evaluated on all methods. We found that there was a strong and statistically significant negative correlation between IM+/EL- performance and EL+/rand- performance. Methods that do not use the EL data as a positive class in their training sets outperform those that do. Because of this correlation, we conclude that the ability of methods to discriminate between mass-spec identified and immunogenic epitopes cannot be correctly evaluated with the data available to us. A detailed description of our analysis can be found below.

We computed AUROC and AUPRC for each of these methods, using both sources of IM+ data: the Neoepitope test set, the IEDB Infectious Disease test set. This yielded 15 AUROC values and 15 AUPRC values for each source of IM+ data, presented in Supplementary Table 1.

**Supplementary Table 1**

| Source                | Neoepitopes |        | IEDB Infectious Disease Antigens |        |
|-----------------------|-------------|--------|----------------------------------|--------|
|                       | AUROC       | AUPRC  | AUROC                            | AUPRC  |
| BigMHC EL             | 0.1113      | 0.0003 | 0.1674                           | 0.0030 |
| BigMHC IM             | 0.3397      | 0.0005 | 0.3715                           | 0.0040 |
| BigMHC ELIM           | 0.2965      | 0.0004 | 0.3096                           | 0.0035 |
| PRIME-2.0 Scores      | 0.2087      | 0.0004 | 0.3236                           | 0.0036 |
| PRIME-2.0 Ranks       | 0.2141      | 0.0029 | 0.3174                           | 0.0100 |
| MixMHCpred-2.2 Scores | 0.1936      | 0.0004 | 0.2391                           | 0.0032 |
| MixMHCpred-2.2 Ranks  | 0.1899      | 0.0004 | 0.2392                           | 0.0076 |
| MHCflurry-2.0 Scores  | 0.1632      | 0.0003 | 0.2245                           | 0.0032 |
| MHCflurry-2.0 Ranks   | 0.1632      | 0.0003 | 0.2245                           | 0.0032 |
| TransPHLA             | 0.3675      | 0.0005 | 0.3585                           | 0.0039 |
| MHCnuggets-2.4.0      | 0.4736      | 0.0006 | 0.3815                           | 0.0039 |
| NetMHCpan-4.1 Scores  | 0.2490      | 0.0004 | 0.3137                           | 0.0035 |
| NetMHCpan-4.1 Ranks   | 0.2382      | 0.0004 | 0.2851                           | 0.0034 |

|                 |        |        |        |        |
|-----------------|--------|--------|--------|--------|
| HLAthena Scores | 0.2284 | 0.0004 | 0.2308 | 0.0032 |
| HLAthena Ranks  | 0.2289 | 0.0004 | 0.2308 | 0.0035 |

Next, we compared these values to the AUROC and AUPRC when all of the mass-spec identified epitopes were used as positives and the negatives were random. Because these performance statistics were stratified by allele, we took the mean AUROC and AUPRC for all alleles, so that each method was represented by a single AUROC and AUPRC value.

Finally, we computed the Spearman Correlations in Supplementary Table 2.

### Supplementary Table 2

| Spearman Correlation of All Method Performances on all EL alleles<br>(EL-pos/random-neg) and the IM-pos/EL-neg Performances |                      |                        |                                  |                      |
|-----------------------------------------------------------------------------------------------------------------------------|----------------------|------------------------|----------------------------------|----------------------|
| Metric                                                                                                                      | Neopeptide Test Set  |                        | IEDB Infectious Disease Test Set |                      |
|                                                                                                                             | AUROC                | AUPRC                  | AUROC                            | AUPRC                |
| Correlation                                                                                                                 | -0.5179              | -0.8393                | -0.7964                          | -0.7536              |
| p-value                                                                                                                     | $4.8 \times 10^{-2}$ | $9.137 \times 10^{-5}$ | $3.8 \times 10^{-4}$             | $1.2 \times 10^{-3}$ |

### AUROC and AUPRC Metrics

Our test sets are imbalanced, so high AUROC does not imply high AUPRC, nor vice versa; therefore, these results do not demonstrate inconsistencies. In imbalanced evaluation frameworks, neither AUROC nor AUPRC alone is sufficient for describing the model performance as they measure different aspects of a predictor; namely, these curves demonstrate the change in sensitivity over: specificity (ROC) and precision (PRC). If one observes a high AUROC and a low AUPRC, then the model is predicting true negatives better than true positives. Conversely, if one observes a low AUROC and high AUPRC, then the model is more precise at the cost of specificity.

### BigMHC IM Generalization Across Alleles

Because data is limited it is difficult to assess the true generalizability across different alleles. However, we computed the BigMHC IM AUROC and AUPRC for each allele in the neopeptide test set and the IEDB infectious disease test set in Supplementary Table 3 and Supplementary Table 4 respectively. We also analyzed whether BigMHC IM performance is skewed toward a few common alleles. Although there is substantial variability in performance across alleles, we do not see a trend (average Spearman correlation magnitude is 0.1032), where BigMHC IM performance is better on the alleles with more evaluation data.

**Supplementary Table 3**

| BigMHC IM Neopeptide Immunogenicity Evaluation |           |           |        |        |
|------------------------------------------------|-----------|-----------|--------|--------|
| Allele                                         | Negatives | Positives | AUROC  | AUPRC  |
| HLA-A*01:01                                    | 25        | 19        | 0.4484 | 0.4740 |
| HLA-A*02:01                                    | 139       | 25        | 0.4213 | 0.1216 |
| HLA-A*03:01                                    | 30        | 9         | 0.4889 | 0.2231 |
| HLA-A*11:01                                    | 10        | 4         | 0.3250 | 0.4076 |
| HLA-A*23:01                                    | 5         | 5         | 0.2000 | 0.3408 |
| HLA-A*30:02                                    | 2         | 21        | 0.5714 | 0.9488 |
| HLA-A*31:01                                    | 9         | 5         | 0.2444 | 0.2416 |
| HLA-A*68:02                                    | 9         | 11        | 0.2727 | 0.4177 |
| HLA-B*07:02                                    | 47        | 17        | 0.6233 | 0.3024 |
| HLA-B*08:01                                    | 15        | 15        | 0.3911 | 0.4878 |
| HLA-B*15:01                                    | 24        | 3         | 0.3750 | 0.0913 |
| HLA-B*18:01                                    | 13        | 22        | 0.5035 | 0.6891 |
| HLA-B*35:01                                    | 14        | 7         | 0.7143 | 0.7039 |
| HLA-B*40:01                                    | 10        | 3         | 0.3667 | 0.1751 |
| HLA-B*40:02                                    | 1         | 1         | 1.0000 | 1.0000 |
| HLA-B*44:02                                    | 21        | 1         | 0.5714 | 0.0500 |
| HLA-B*49:01                                    | 16        | 3         | 0.3750 | 0.1371 |
| HLA-B*53:01                                    | 12        | 3         | 0.6944 | 0.5940 |
| HLA-B*55:01                                    | 6         | 3         | 0.5000 | 0.5323 |
| HLA-B*57:01                                    | 8         | 2         | 0.7500 | 0.2875 |
| HLA-C*03:03                                    | 17        | 5         | 0.4706 | 0.2271 |
| HLA-C*04:01                                    | 9         | 1         | 1.0000 | 1.0000 |
| HLA-C*05:01                                    | 44        | 2         | 0.4659 | 0.0378 |
| HLA-C*06:02                                    | 10        | 1         | 0.8000 | 0.1667 |
| HLA-C*07:04                                    | 7         | 1         | 0.1429 | 0.0714 |

**Supplementary Table 4**

| BigMHC IM IEDB Infectious Disease Immunogenicity Evaluation |           |           |        |        |
|-------------------------------------------------------------|-----------|-----------|--------|--------|
| Allele                                                      | Negatives | Positives | AUROC  | AUPRC  |
| HLA-A*01:01                                                 | 28        | 90        | 0.4861 | 0.7805 |
| HLA-A*02:01                                                 | 79        | 575       | 0.5820 | 0.9077 |
| HLA-A*02:05                                                 | 2         | 3         | 0.3333 | 0.6556 |
| HLA-A*03:01                                                 | 74        | 23        | 0.6839 | 0.3586 |
| HLA-A*11:01                                                 | 138       | 54        | 0.6116 | 0.3575 |
| HLA-A*23:01                                                 | 2         | 3         | 0.6667 | 0.7639 |
| HLA-A*24:02                                                 | 61        | 108       | 0.4399 | 0.5794 |
| HLA-A*26:01                                                 | 1         | 39        | 0.3077 | 0.9712 |
| HLA-A*29:02                                                 | 2         | 39        | 0.6282 | 0.9776 |
| HLA-A*30:01                                                 | 3         | 20        | 0.6333 | 0.9145 |
| HLA-A*33:03                                                 | 3         | 2         | 0.5000 | 0.6625 |
| HLA-A*34:02                                                 | 4         | 5         | 0.6500 | 0.7685 |
| HLA-A*68:02                                                 | 16        | 3         | 0.3958 | 0.1228 |
| HLA-A*74:01                                                 | 1         | 3         | 0.6667 | 0.9028 |
| HLA-B*07:02                                                 | 84        | 103       | 0.4473 | 0.5224 |
| HLA-B*08:01                                                 | 26        | 44        | 0.5087 | 0.6701 |
| HLA-B*13:02                                                 | 1         | 2         | 1.0000 | 1.0000 |
| HLA-B*14:02                                                 | 2         | 2         | 0.2500 | 0.3333 |
| HLA-B*15:01                                                 | 16        | 35        | 0.3696 | 0.5939 |
| HLA-B*15:03                                                 | 6         | 3         | 0.1111 | 0.1960 |
| HLA-B*15:10                                                 | 7         | 2         | 0.8571 | 0.7083 |
| HLA-B*27:01                                                 | 1         | 1         | 0.0000 | 0.2500 |
| HLA-B*27:02                                                 | 6         | 7         | 0.4762 | 0.6469 |
| HLA-B*27:05                                                 | 6         | 14        | 0.4048 | 0.7050 |
| HLA-B*35:01                                                 | 6         | 69        | 0.5097 | 0.9435 |
| HLA-B*40:01                                                 | 9         | 30        | 0.7889 | 0.8981 |
| HLA-B*41:02                                                 | 10        | 2         | 0.3500 | 0.1269 |
| HLA-B*42:01                                                 | 1         | 1         | 1.0000 | 1.0000 |
| HLA-B*44:02                                                 | 2         | 36        | 0.7361 | 0.9800 |
| HLA-B*44:03                                                 | 2         | 19        | 0.5789 | 0.9444 |
| HLA-B*45:01                                                 | 1         | 1         | 0.0000 | 0.2500 |
| HLA-B*49:01                                                 | 2         | 1         | 1.0000 | 1.0000 |
| HLA-B*51:01                                                 | 1         | 36        | 0.0000 | 0.8976 |
| HLA-B*53:01                                                 | 5         | 8         | 0.8000 | 0.8406 |
| HLA-B*58:01                                                 | 2         | 1         | 0.5000 | 0.2500 |
| HLA-C*04:01                                                 | 3         | 2         | 0.6667 | 0.4167 |
| HLA-C*07:01                                                 | 6         | 7         | 0.1667 | 0.3651 |
| HLA-C*07:02                                                 | 8         | 16        | 0.5078 | 0.6646 |
| HLA-C*16:01                                                 | 9         | 2         | 0.9444 | 0.7917 |
